# Supplementary material for: A bidirectional electrocatalyst for enhancing Li2S nucleation and decomposition kinetics in lithium–sulfur batteries
Source: Royal Society of Chemistry journal article supplement (doi:10.1039/d2ta05046c), 2022-01-01
Supplement: d2ta05046c1.pdf [file d2ta05046c1.pdf]

***A Bidirectional Electrocatalyst for Enhancing Li<sub>2</sub>S Nucleation  
and Decomposition Kinetics in Lithium-Sulfur Batteries***

*Yilun Ren<sup>‡</sup>, Shaozhong Chang<sup>‡</sup>, Libing Hu<sup>‡</sup>, Biao Wang, Dongyue Sun, Hao Wu,*

*Yujie Ma, Yurong Yang, Shaochun Tang\*, Xiangkang Meng\**

*National Laboratory of Solid State Microstructures, Collaborative Innovation*

*Center of Advanced Microstructures, College of Engineering and Applied Sciences,*

*Nanjing University, Jiangsu, 210093, China*

\* Corresponding authors:

Email: [tangsc@nju.edu.cn](mailto:tangsc@nju.edu.cn); [mengxk@nju.edu.cn](mailto:mengxk@nju.edu.cn)

<sup>‡</sup> These authors contributed equally to this work.

**Experimental Section**

**Figure S1 to Figure S27**

**Table S1 to Table S3**

## Experimental Section

**Materials:** MAX ( $\text{Ti}_3\text{AlC}_2$ ) powder was purchased from Jilin 11 Technology Co. Ltd. Hydrochloric acid (HCl), lithium fluoride (LiF), and ethanol were purchased from Nanjing Chemical Reagent Co. Ltd.  $\text{CoCl}_2 \cdot 6\text{H}_2\text{O}$  (99.99% AR, grade),  $\text{NiCl}_2 \cdot 6\text{H}_2\text{O}$  (99.99%, AR, grade), multiwalled carbon nanotubes (MWCNTs), selenium (Se) and N,N-dimethylformamide (DMF) were obtained from Aladdin Reagent. 1,4-Benzenedicarboxylic acid (1,4-BDC) and triethylamine (TEA) were purchased from Tianjin Fuchen Chemicals Reagent Factory. All chemicals were used directly without further purification. The deionized (DI) water was purified using a Milli-Q3 System (Millipore, France).

**Preparation of  $\text{Ti}_3\text{C}_2\text{T}_x/\text{Ni-Co MOF Nanosheets}$ :**  $\text{Ti}_3\text{C}_2\text{T}_x/\text{Ni-Co MOFs}$  were prepared by using the method as described in a previous report<sup>1</sup>. First, 100 mg  $\text{Ti}_3\text{C}_2\text{T}_x$  was dispersed in a solution containing 32 ml DMF, 2 ml ethanol and 2 ml DI water. Next, 0.375 mmol  $\text{NiCl}_2 \cdot 6\text{H}_2\text{O}$ , 0.375 mmol  $\text{CoCl}_2 \cdot 6\text{H}_2\text{O}$  and 0.75 mmol 1,4-BDC were dissolved into the above solution. Subsequently, 0.8 ml TEA was quickly injected into the mixed solution. The solution was stirred and then continuously ultrasonicated for 8 h under sealed conditions. Finally,  $\text{Ti}_3\text{C}_2\text{T}_x/\text{Ni-Co MOFs}$  were collected after centrifugation, washing and drying at 50 °C for 24 h under vacuum conditions. The Ni-Co MOF was prepared in the same way without adding  $\text{Ti}_3\text{C}_2\text{T}_x$ .

**Preparation of  $\text{Ti}_3\text{C}_2/(\text{NiCo})_{0.85}\text{Se}$ :** The  $\text{Ti}_3\text{C}_2/(\text{NiCo})_{0.85}\text{Se}$  sample was synthesized via a gas-phase selenization method. Se powder (0.4 g) in a porcelain boat was placed in upstream and 0.2 g  $\text{Ti}_3\text{C}_2\text{T}_x/\text{Ni-Co MOF}$  was placed downstream of a tube furnace. Then, the materials in the porcelain boats were reacted at 500 °C for 2 h with a heating rate of 2 °C  $\text{min}^{-1}$  under an  $\text{Ar}/\text{H}_2$  (9:1) atmosphere. Black  $\text{Ti}_3\text{C}_2/(\text{NiCo})_{0.85}\text{Se}$  powders were obtained after naturally cooling down under  $\text{Ar}/\text{H}_2$  flow. Similarly,  $(\text{NiCo})_{0.85}\text{Se}$  composites were prepared by one-pot selenization by using Ni-Co MOF as precursors.

**Materials Characterization:** X-ray diffraction (XRD, PANALYTICAL) was used to investigate the crystal structures of the composites from 5° to 80°. The elemental compositions of the surface of the composites were obtained with an ESCALAB250 X-ray photoelectron spectroscopy (XPS, Thermo Fisher Scientific). The structure and morphology of the samples were characterized by transmission electron microscopy (TEM, JEM-2100F) and the scanning electron microscopy (SEM, Hitachi S-4800). The elemental mappings of the samples were recorded by energy-dispersive spectroscopy (EDS). Thermogravimetric analysis (TGA, NETZSCH-Gertebau GmbH, Germany) was used to confirm the contents of each section of the samples in nitrogen flow with a heating rate of 10 °C min<sup>-1</sup> from 50 °C to 800 °C. Raman spectra were determined with a Renishaw inVia spectrometer system with a 532 nm laser. The specific surface of the samples was measured by the Brunauer–Emmett–Teller method (kubo X1000, China). UV–Vis spectroscopy measurements were collected from a SHIMADZU UV-3600 spectrometer.

**Visualized Adsorption of Lithium Polysulfides:** A 20 mM Li<sub>2</sub>S<sub>6</sub> solution was prepared by dissolving Li<sub>2</sub>S (purity>99.9%, Aladdin) and S (molar ratio of 1:5) into 1,2-dimethoxyethane (DME) and 1,3-dioxolane (DOL), followed by vigorous stirring at 50 °C for 24 h. Typically, 20 mg of the samples was added to 1.0 mL Li<sub>2</sub>S<sub>6</sub> solution.

**Nucleation Tests of Li<sub>2</sub>S:** 0.5 M Li<sub>2</sub>S<sub>8</sub> solution was homemade by stirring Li<sub>2</sub>S and S (molar ratio of 1:7) in tetraethylene glycol solvent for 24 h. Ti<sub>3</sub>C<sub>2</sub>/(NiCo)<sub>0.85</sub>Se, Ti<sub>3</sub>C<sub>2</sub> and (NiCo)<sub>0.85</sub>Se were dispersed in ethanol, dropped onto carbon paper (CP) disks with a diameter of 12 mm and dried at 50 °C for 24 h. The modified CP disks with a loading of 1 mg cm<sup>-2</sup>, lithium foil and Celgard 2500 membrane were used as the cathode, anode and separator to assemble coin cells, respectively. Then, 20 μL of 1.0 M LiTFSI electrolyte was added to the anode side, and 20 μL Li<sub>2</sub>S<sub>8</sub> solution was added to the cathode side. The cell was galvanostatically discharged to 2.06 V at 0.112 mA, and then discharged potentiostatically at 2.02 V for 20000 seconds. The precipitation capacity of Li<sub>2</sub>S can be calculated through Faraday's Law.

***Dissolution Tests of Li<sub>2</sub>S:*** Except for the catalyst electrode, the cells for the Li<sub>2</sub>S dissolution tests were identical to those in the measurement of Li<sub>2</sub>S nucleation. The cells were first galvanostatically discharged to 1.7 V at 0.10 mA and then discharged galvanostatically to 1.7 V at 0.01 mA for fully converting LiPS to solid Li<sub>2</sub>S. Finally, the cells were charged potentiostatically at 2.35 V until 30000 s for the sufficient dissolution of Li<sub>2</sub>S.

***Assembly of Li<sub>2</sub>S<sub>6</sub> Symmetric Cells:*** Symmetric cells were assembled with two identical electrodes of Ti<sub>3</sub>C<sub>2</sub>/(NiCo)<sub>0.85</sub>Se, Ti<sub>3</sub>C<sub>2</sub> and (NiCo)<sub>0.85</sub>Se loaded onto CP disks. 0.2 M Li<sub>2</sub>S<sub>6</sub> solution (in DME/DOL) solution containing 1.0 M LiTFSI and 0.5 M LiNO<sub>3</sub> was used as the electrolyte. Cyclic voltammetry (CV) tests were carried out at scan rates from 0.5 to 10 mV s<sup>-1</sup> between -0.8 V and 0.8 V on a CHI660D electrochemical workstation. The symmetric cell with Ti<sub>3</sub>C<sub>2</sub>/(NiCo)<sub>0.85</sub>Se electrodes without Li<sub>2</sub>S<sub>6</sub> was assembled and tested as a control experiment.

***Preparation of Ti<sub>3</sub>C<sub>2</sub>/(NiCo)<sub>0.85</sub>Se@PP Separators:*** The modified commercial polypropylene celgard (PP) separator was obtained by a typical doctor-blade coating method. The as-synthesized Ti<sub>3</sub>C<sub>2</sub>/(NiCo)<sub>0.85</sub>Se, MWCNTs and PVDF with a weight ratio of 8:1:1 using NMP as the solvent were mixed, and then coated onto PP. The obtained Ti<sub>3</sub>C<sub>2</sub>/(NiCo)<sub>0.85</sub>Se@PP separator was dried under vacuum at 50 °C for 24 h and cut into 16 mm circular disks for direct use. The Ti<sub>3</sub>C<sub>2</sub>@PP or (NiCo)<sub>0.85</sub>Se@PP separator was prepared through similar procedures except Ti<sub>3</sub>C<sub>2</sub>/(NiCo)<sub>0.85</sub>Se was replaced by Ti<sub>3</sub>C<sub>2</sub> or (NiCo)<sub>0.85</sub>Se.

***Preparation of HPGC/S:*** The HPGC<sup>2</sup>/S composites were prepared using a conventional melt-diffusion method. In a typical procedure, HPGC and S were mixed with an appropriate mass ratio of 8:2 and then heated at 155 °C for 16 h. The product was collected after cooling to room temperature to generate the HPGC/S composite.

**Electrochemical Tests:** A homogeneous slurry was prepared by mixing HPGC/S, polyvinylidene fluoride (PVDF, 5%) and acetylene black in a weight ratio of 7:2:1, and then the slurry was cast on Al foil and dried at 60 °C for 24 h in a vacuum oven to obtain the electrode film. Subsequently, the disks with a diameter of 10 mm were obtained by cutting the electrode film, and the loading of active materials on each disk was approximately 1.5 mg cm<sup>-2</sup> (N/P ratio is 16.7). And for the high loading test, the sulfur loading is 6.4 mg cm<sup>-2</sup> (N/P ratio is 3.9). The electrochemical tests were carried out by using CR2032-type coin cells that were assembled in an Ar-filled glove box. The anode, separator, and electrolyte were commercial Li metal (15.6 mm in diameter), modified Celgard 2500 and the solution by adding 1 M lithium bis(trifluoromethanesulfonyl) imide (LiTFSI) and 0.5 M LiNO<sub>3</sub> in DOL/DME (1:1 by volume) solvents, respectively. The electrolyte/sulfur (E/S) was maintained at ~20 μL mg<sup>-1</sup> per cell. CV tests were carried out at scan rates of 0.1 mV s<sup>-1</sup> between 1.7 V and 2.8 V on a CHI660D electrochemical workstation, and electrochemical impedance spectroscopy (EIS) was performed using an Autolab electrochemical workstation over a frequency range of 0.01 Hz-10 kHz. The galvanostatic charge-discharge profiles were obtained using a Land battery tester with a voltage from 1.7 to 2.8 V vs Li<sup>+</sup>/Li.

**Calculations for Diffusion Coefficient of Li Ions:** The coefficient of Li<sup>+</sup> diffusion can be estimated by the Randles-Sevcik equation:

$$I_p = (2.69 * 10^5) n^{3/2} S D^{1/2} C v^{1/2}$$

where  $I_p$  is the peak current,  $n$  is the transferred electrons number,  $S$  is the area of the electrode,  $D$  is the Li<sup>+</sup> diffusion coefficient,  $C$  is the concentration change of Li<sup>+</sup> during the electrochemical reaction, and  $v$  is the CV scan rate. The  $n$ ,  $S$ , and  $C$  are constant, thus,  $I_p$  and  $v^{1/2}$  have a linear relationship, and  $D$  is positively correlated with the slopes of the curves ( $I_p - v^{1/2}$ ).

**Computational Methods:** We employed the Vienna Ab Simulation Initio Package (VASP)<sup>3, 4</sup> to perform all density functional theory (DFT) calculations within the generalized gradient approximation (GGA) using the PBE<sup>5</sup> formulation. We have

chosen the projected augmented wave (PAW) potentials<sup>6, 7</sup> to describe the ionic cores and take valence electrons into account using a plane wave basis set with a kinetic energy cut-off of 400 eV. Partial occupancies of the Kohn–Sham orbitals were allowed using the Gaussian smearing method and a width of 0.03 eV. The electronic energy was considered self-consistent when the energy change was smaller than  $10^{-4}$  eV. During structural optimizations, the Brillouin zone was sampled by  $3 \times 3 \times 2$  k-points (Monkhorst–Pack) in  $(\text{NiCo})_{0.85}\text{Se}$  and a  $1 \times 1 \times 1$  Monkhorst-Pack k-point grid in  $\text{Ti}_3\text{C}_2/(\text{NiCo})_{0.85}\text{Se}$ . The binding strength  $E_b$  of lithium polysulfides on the  $(\text{NiCo})_{0.85}\text{Se}$  and  $\text{Ti}_3\text{C}_2/(\text{NiCo})_{0.85}\text{Se}$  surfaces was calculated as follows:  $E_b = (E_{\text{sub}} + E_{\text{lp}}) - E_{\text{sub+lp}}$ , where  $E_{\text{sub+lp}}$ ,  $E_{\text{lp}}$ , and  $E_{\text{sub}}$  denote the calculated energies of the total adsorption system, adsorbates, and substrates, respectively. The free energy was calculated using the equation:  $G = E + \text{ZPE} - \text{TS}$ , where  $G$ ,  $E$ ,  $\text{ZPE}$  and  $\text{TS}$  are the free energy, total energy from DFT calculations, zero-point energy and entropic contributions, respectively. Finally, the free energies ( $G$ ) of different intermediates are defined as  $\Delta G = G_i - G_r$  ( $G_i$  is the energy of intermediates and  $G_r$  is the total energy of reactants). The kinetic barriers of  $\text{Li}_2\text{S}$  dissociation were located using the climbing-image nudged elastic band (CINEB) method<sup>8</sup>.

## Supplementary Figures and Tables

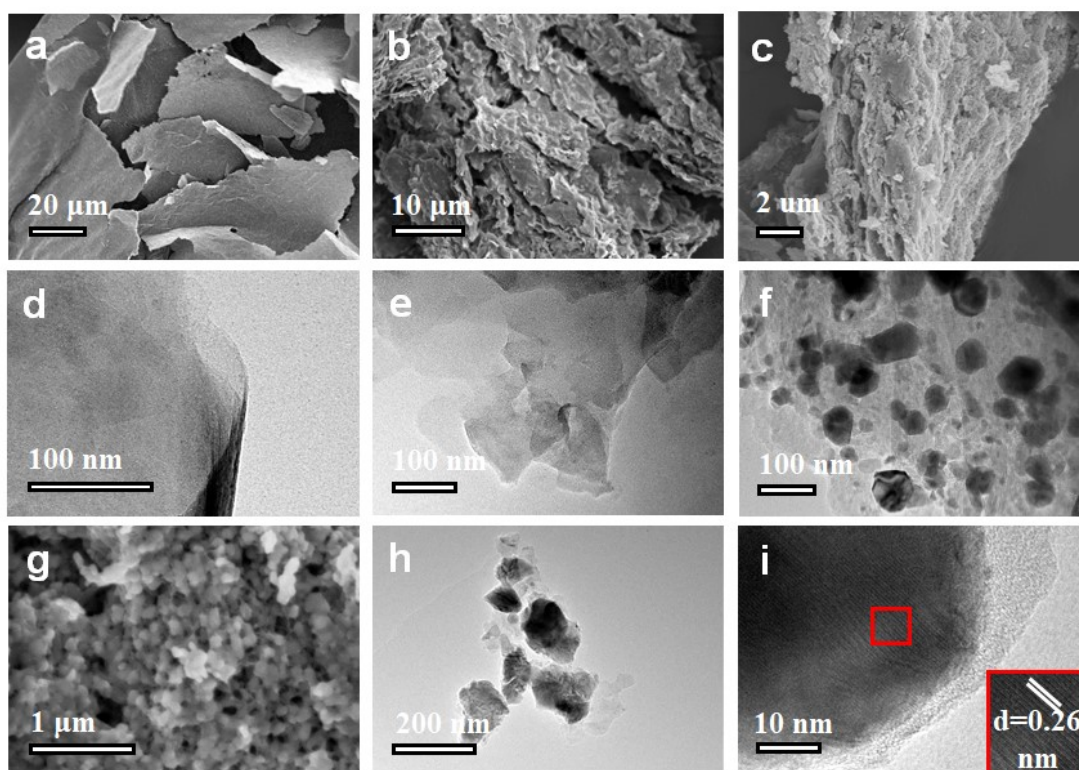

**Figure S1.** a) SEM and d) TEM images of  $\text{Ti}_3\text{C}_2\text{T}_x$ ; b) SEM and e) TEM images of  $\text{Ti}_3\text{C}_2\text{T}_x/\text{Ni-Co MOF}$ ; c) SEM and f) TEM images of  $\text{Ti}_3\text{C}_2/(\text{NiCo})_{0.85}\text{Se}$ ; g) SEM and h) TEM images of  $(\text{NiCo})_{0.85}\text{Se}$ ; i) HRTEM images of  $(\text{NiCo})_{0.85}\text{Se}$ .

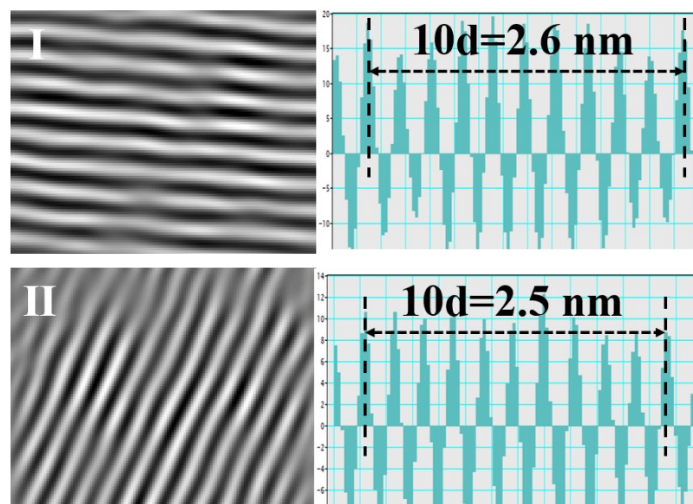

**Figure S2.** Fourier transformed crystalline lattice, corresponding to the HRTEM image.

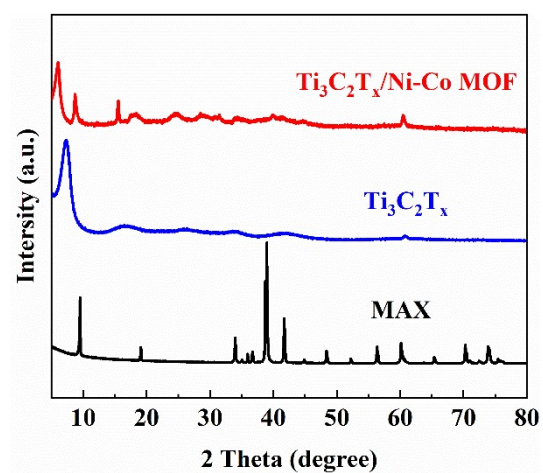

**Figure S3.** XRD pattern of  $\text{Ti}_3\text{C}_2/\text{Ni-Co MOF}$ ,  $\text{Ti}_3\text{C}_2\text{T}_x$  and MAX.



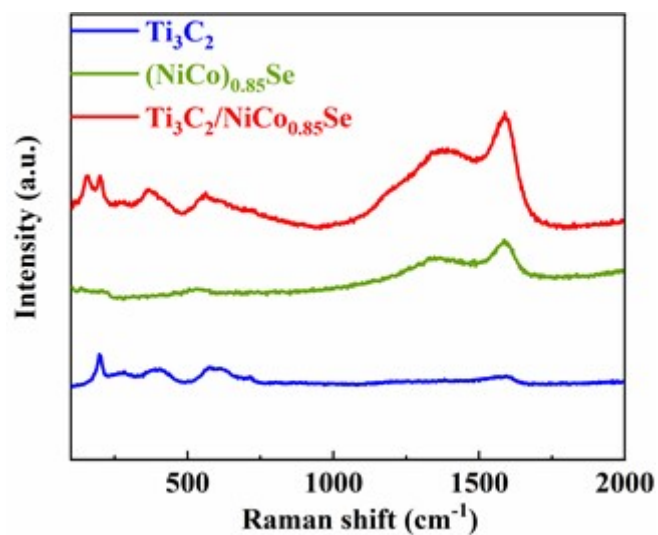

**Figure S4.** Raman spectra of  $\text{Ti}_3\text{C}_2/(\text{NiCo})_{0.85}\text{Se}$ ,  $\text{Ti}_3\text{C}_2$  and  $(\text{NiCo})_{0.85}\text{Se}$ .

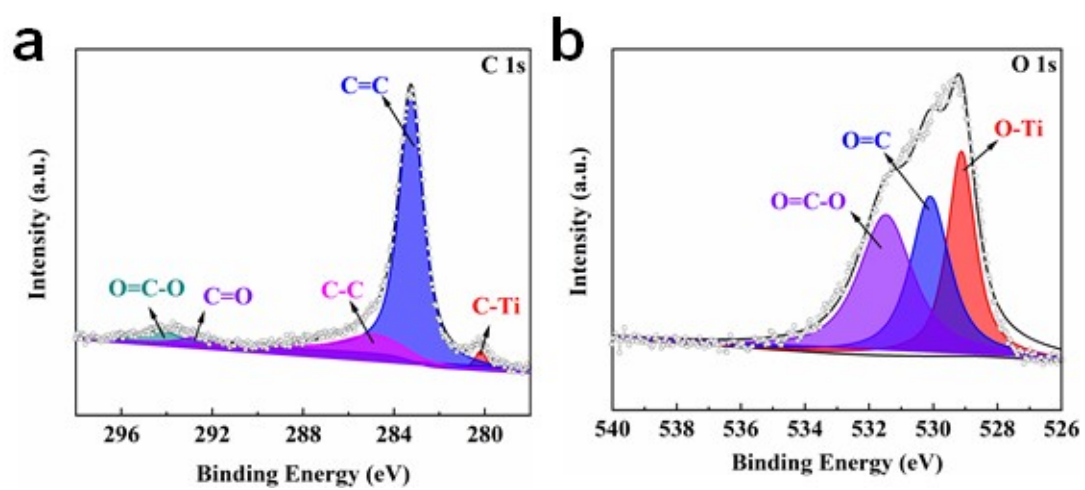

**Figure S5.** High-resolution a) C 1s and b) O 1s XPS spectra of  $\text{Ti}_3\text{C}_2/(\text{NiCo})_{0.85}\text{Se}$ .

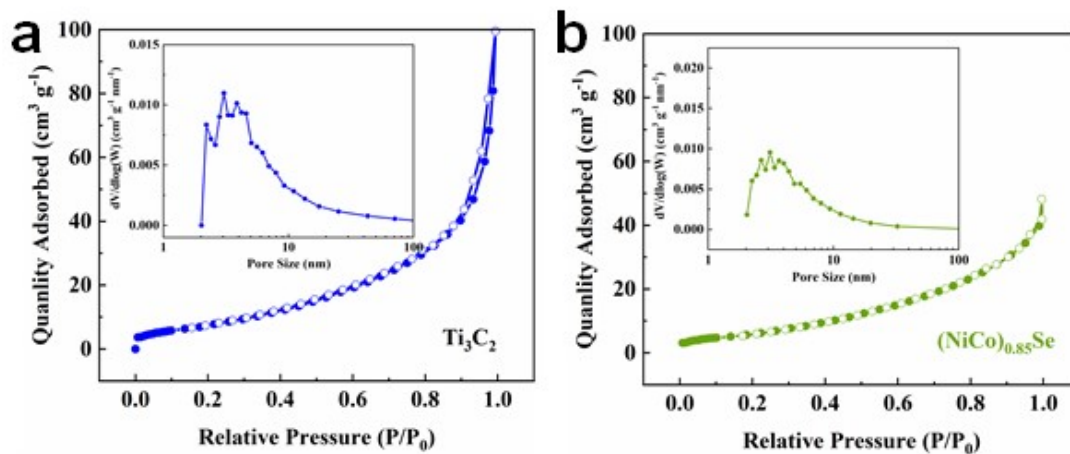

**Figure S6.** N<sub>2</sub> adsorption–desorption isotherm curves and the pore size distribution of a) Ti<sub>3</sub>C<sub>2</sub> and b) (NiCo)<sub>0.85</sub>Se.

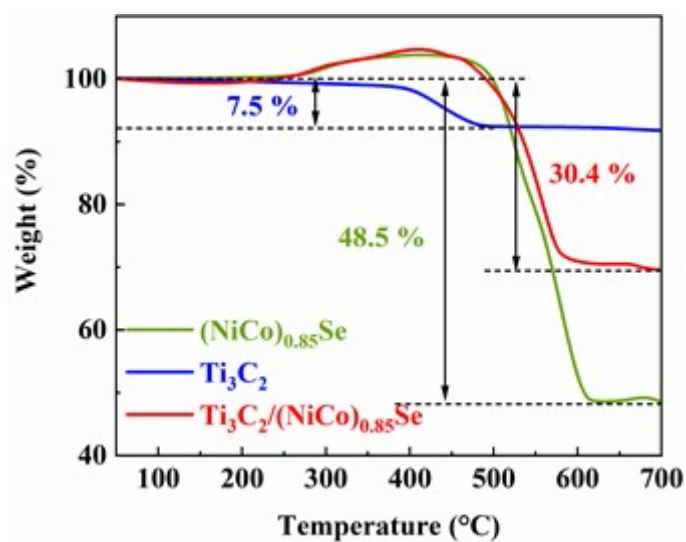

**Figure S7.** TGA of Ti<sub>3</sub>C<sub>2</sub>/(NiCo)<sub>0.85</sub>Se, Ti<sub>3</sub>C<sub>2</sub> and (NiCo)<sub>0.85</sub>Se.

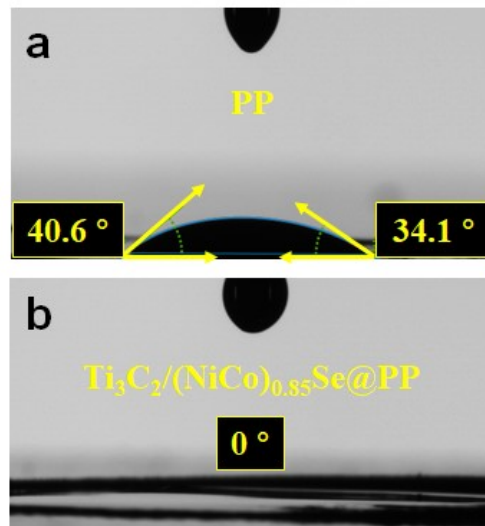

**Figure S8.** The electrolyte contact angle shots of the a) PP and b)  $\text{Ti}_3\text{C}_2/(\text{NiCo})_{0.85}\text{Se}@PP$ .

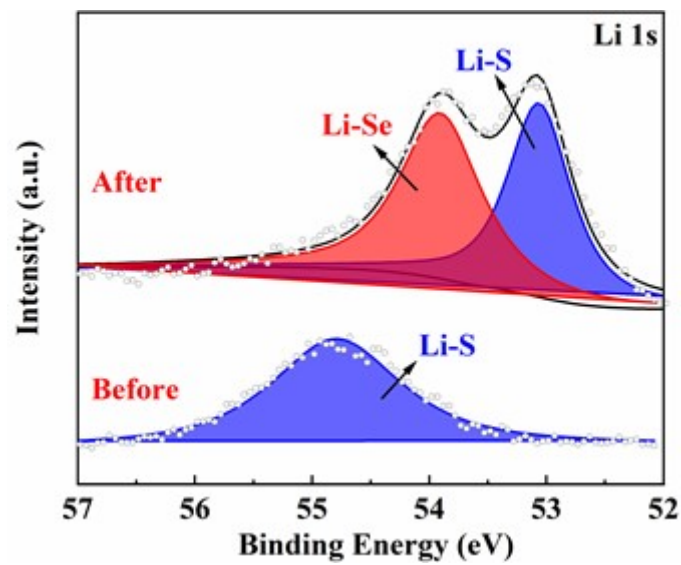

**Figure S9.** High-resolution Li 1s XPS spectra of  $\text{Li}_2\text{S}_6$  before and after adsorption.

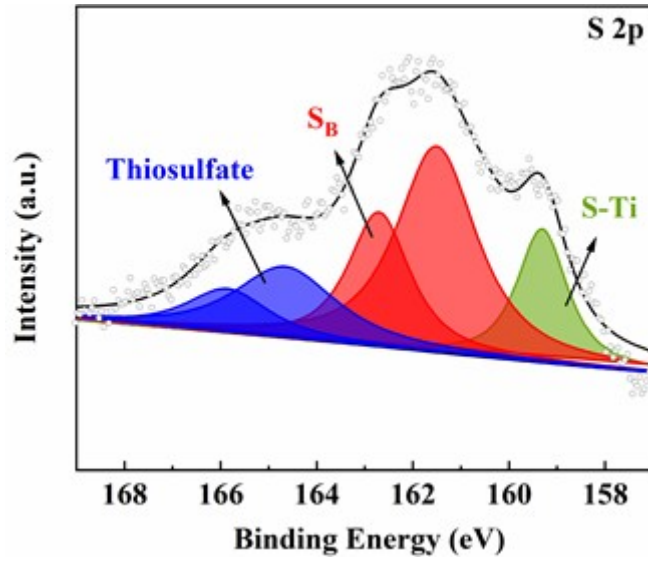

**Figure S10.** High-resolution S 2p XPS spectra of  $\text{Li}_2\text{S}_6$  after adsorption.

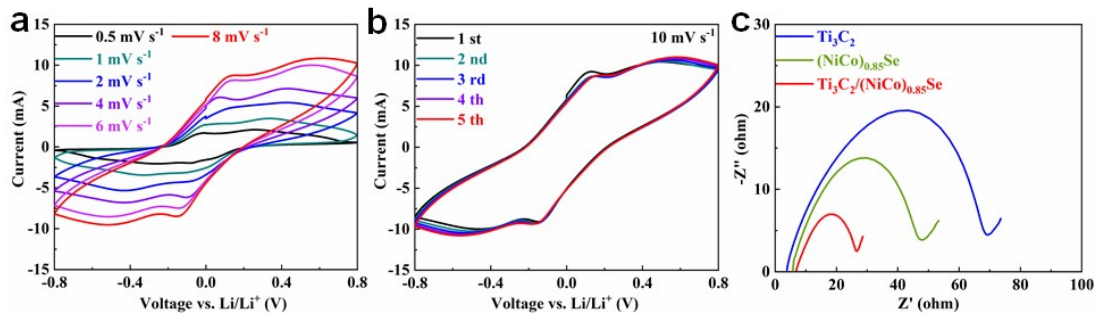

**Figure S11.** CV profiles at a) different scanning rates (0.5-8  $\text{mV s}^{-1}$ ) and b) 10  $\text{mV s}^{-1}$  of  $\text{Ti}_3\text{C}_2/(\text{NiCo})_{0.85}\text{Se}$  symmetrical cells. c) EIS curves of symmetric cells.

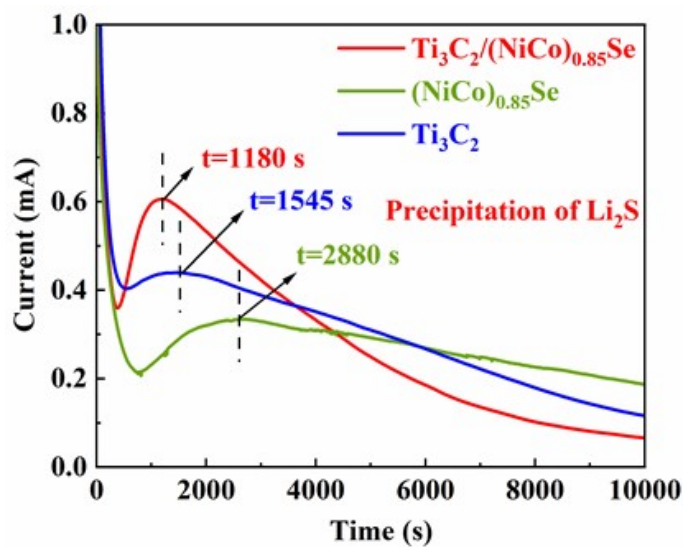

**Figure S12.** Potentiostatic discharge curves of  $\text{Ti}_3\text{C}_2/(\text{NiCo})_{0.85}\text{Se}$ ,  $\text{Ti}_3\text{C}_2$  and  $(\text{NiCo})_{0.85}\text{Se}$ .

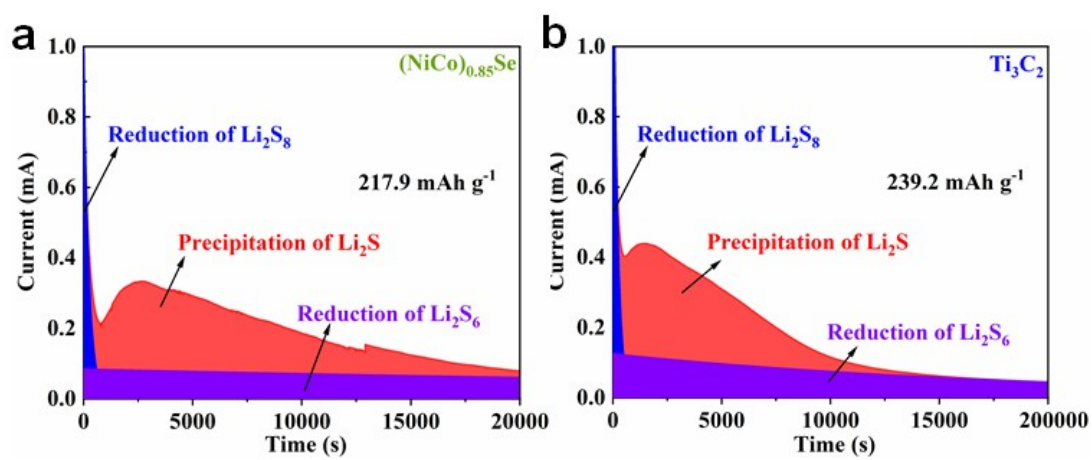

**Figure S13.** Potentiostatic discharge fitted curves of  $(\text{NiCo})_{0.85}\text{Se}$  and  $\text{Ti}_3\text{C}_2$ .

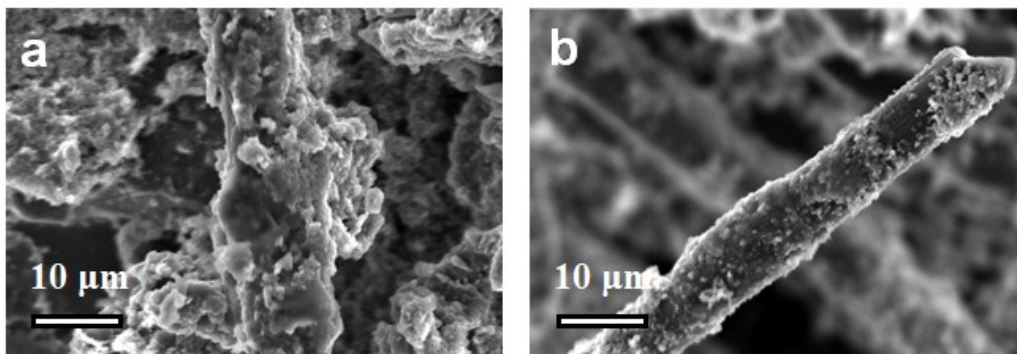

**Figure S14.** SEM images of the precipitation of  $\text{Li}_2\text{S}$  on a)  $\text{Ti}_3\text{C}_2$  and b)  $(\text{NiCo})_{0.85}\text{Se}$  electrodes.

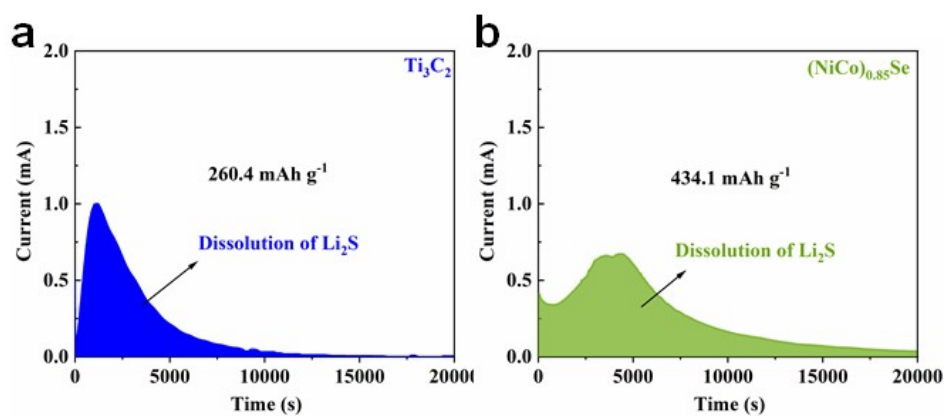

**Figure S15.** Potentiostatic charge fitted curves of a)  $\text{Ti}_3\text{C}_2$  and b)  $(\text{NiCo})_{0.85}\text{Se}$ .

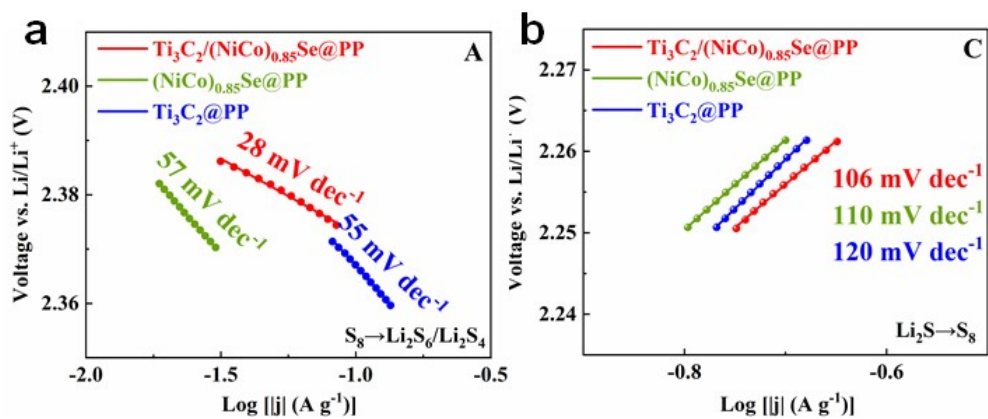

**Figure S16.** The Tafel plots calculated from the a) A and b) C peaks of Ti<sub>3</sub>C<sub>2</sub>@PP, (NiCo)<sub>0.85</sub>Se@PP and Ti<sub>3</sub>C<sub>2</sub>/(NiCo)<sub>0.85</sub>Se@PP.

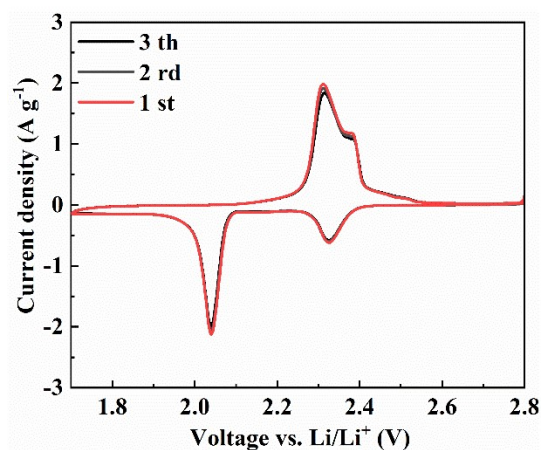

**Figure S17.** CV curves of the Ti<sub>3</sub>C<sub>2</sub>/(NiCo)<sub>0.85</sub>Se@PP cell.

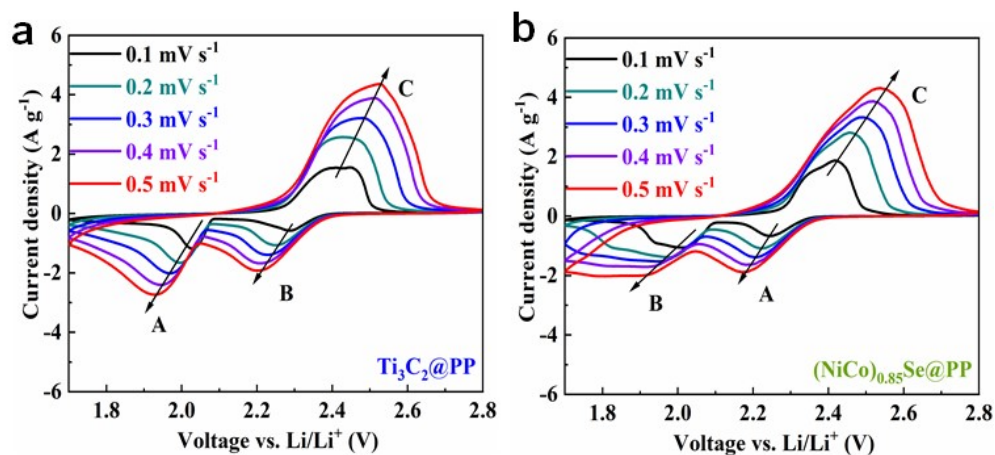

**Figure S18.** CV curves of a)  $\text{Ti}_3\text{C}_2@\text{PP}$  and b)  $(\text{NiCo})_{0.85}\text{Se}@\text{PP}$  cells.

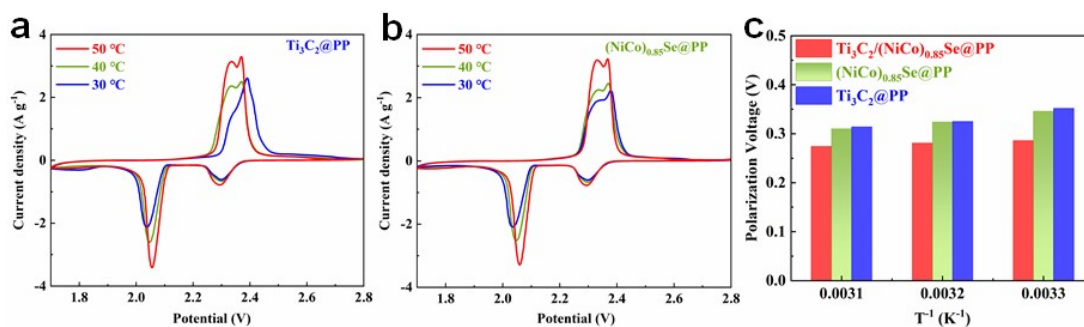

**Figure S19.** CV curves of a)  $\text{Ti}_3\text{C}_2@\text{PP}$  and b)  $(\text{NiCo})_{0.85}\text{Se}@\text{PP}$  cells at various temperatures. c) Polarization voltage gaps of cathodic peaks C and anodic peaks A.



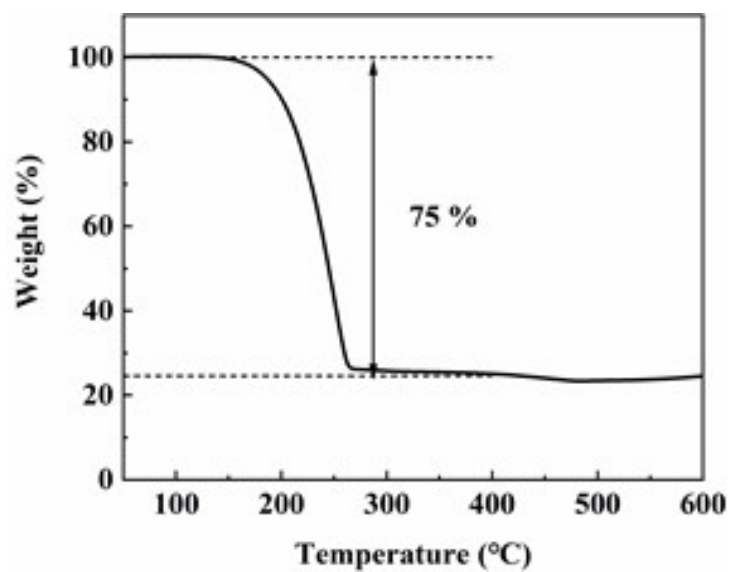

Figure S20. TGA curves of HPGC/S.

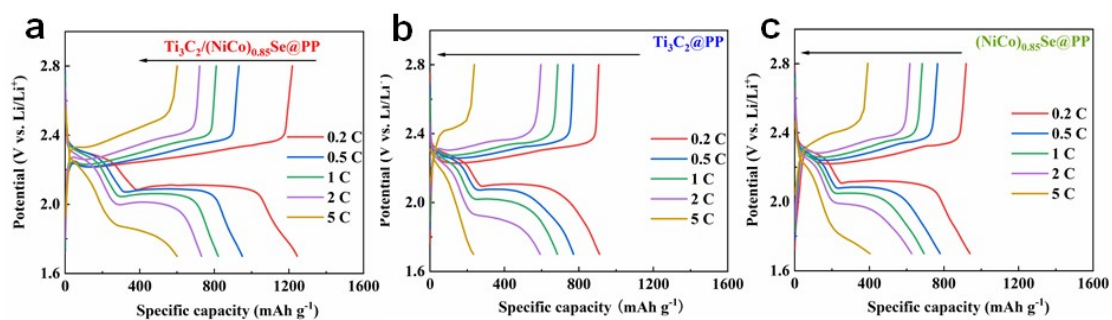

Figure S21. Charge–discharge profiles of the a)  $\text{Ti}_3\text{C}_2/(\text{NiCo})_{0.85}\text{Se}@PP$ , b)  $\text{Ti}_3\text{C}_2@PP$  and c)  $(\text{NiCo})_{0.85}\text{Se}@PP$  separators.

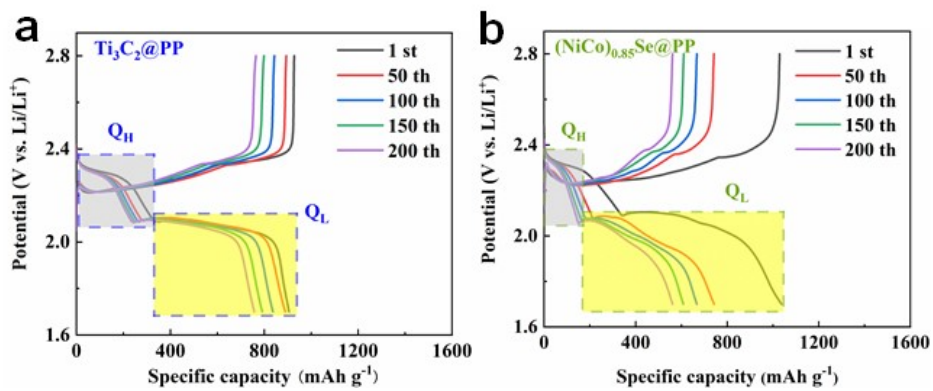

**Figure S22.** Galvanostatic charge–discharge profiles of the  $\text{Ti}_3\text{C}_2@\text{PP}$  and  $(\text{NiCo})_{0.85}\text{Se}@\text{PP}$  separators with different numbers of cycles at 0.2 C.

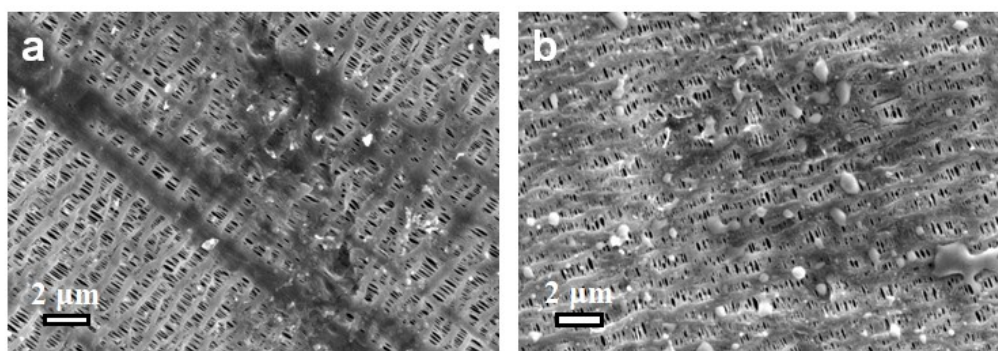

**Figure S23.** SEM images for (a)  $\text{Ti}_3\text{C}_2@\text{PP}$  and (b)  $(\text{NiCo})_{0.85}\text{Se}@\text{PP}$  toward the lithium anode after 200 cycles at 0.2 C.

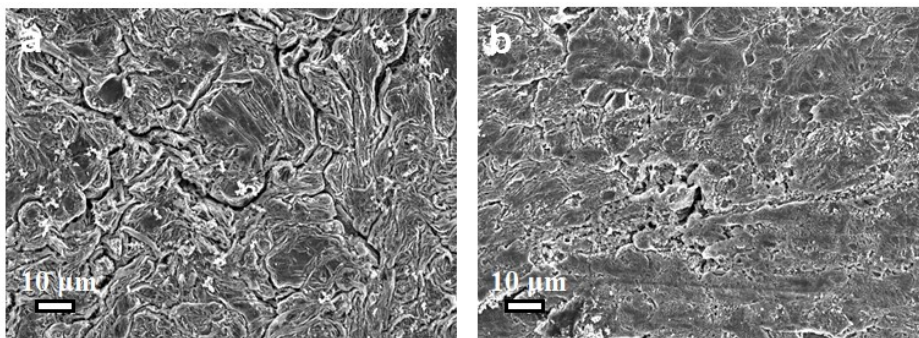

**Figure S24.** SEM images of lithium metal anodes after 200 cycles at 0.2 C for (a) Ti<sub>3</sub>C<sub>2</sub>@PP and (b) (NiCo)<sub>0.85</sub>Se@PP.

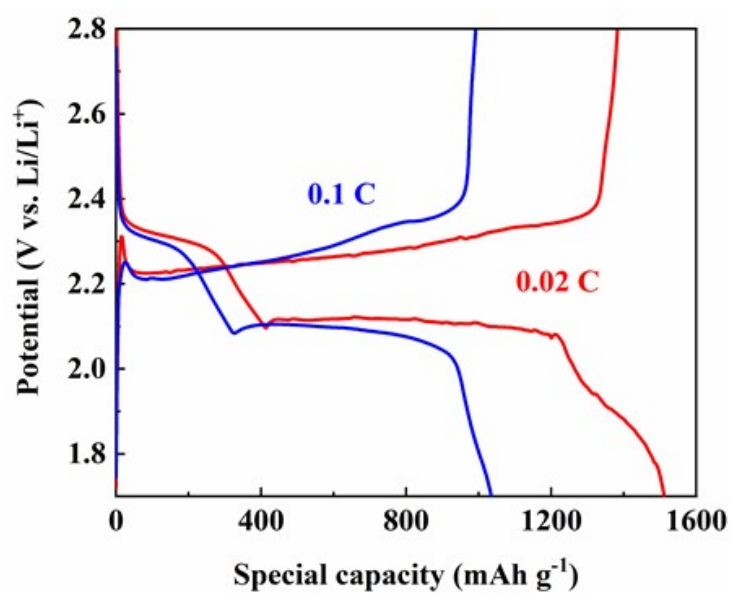

**Figure S25.** Charge-discharge profiles of Ti<sub>3</sub>C<sub>2</sub>/(NiCo)<sub>0.85</sub>Se@PP.

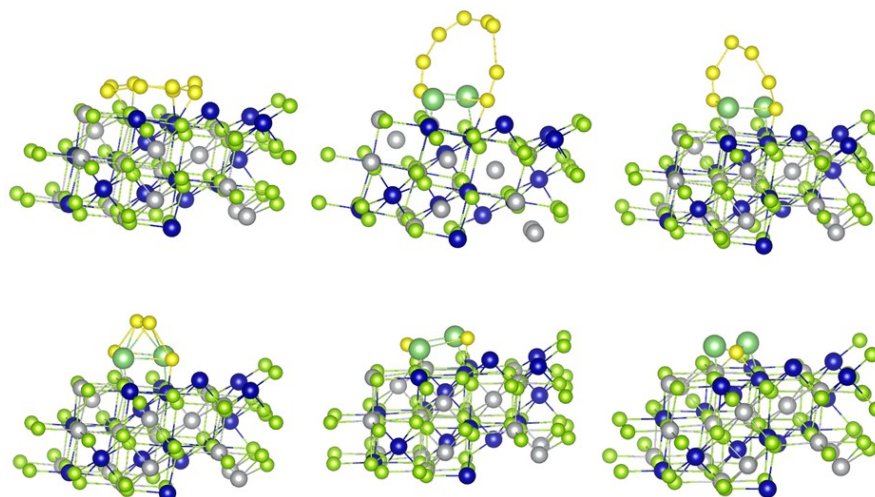

**Figure S26.** The optimized adsorption structures of sulfur species on the  $(\text{NiCo})_{0.85}\text{Se}$  substrate.

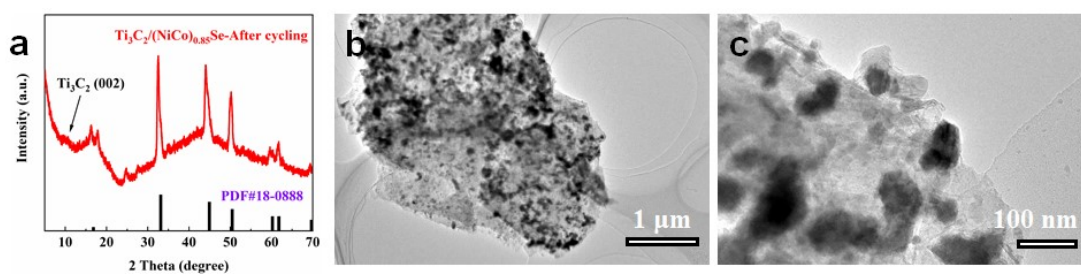

**Figure S27.** a) XRD pattern and b-c) TEM images of  $\text{Ti}_3\text{C}_2/(\text{NiCo})_{0.85}\text{Se}$  after 100 cycles at 1 C.

**Table S1** BET surface area and total pore volume of  $\text{Ti}_3\text{C}_2/(\text{NiCo})_{0.85}\text{Se}$ ,  $(\text{NiCo})_{0.85}\text{Se}$  and  $\text{Ti}_3\text{C}_2$ .

| Sample                                                | BET surface area ( $\text{m}^2 \text{g}^{-1}$ ) | Total pore volume ( $\text{cm}^3 \text{g}^{-1}$ ) |
|-------------------------------------------------------|-------------------------------------------------|---------------------------------------------------|
| $\text{Ti}_3\text{C}_2/(\text{NiCo})_{0.85}\text{Se}$ | 91.839                                          | 0.138                                             |
| $(\text{NiCo})_{0.85}\text{Se}$                       | 46.736                                          | 0.062                                             |
| $\text{Ti}_3\text{C}_2$                               | 56.218                                          | 0.112                                             |

**Table S2.** EIS results of  $\text{Ti}_3\text{C}_2/(\text{NiCo})_{0.85}\text{Se}@PP$ ,  $(\text{NiCo})_{0.85}\text{Se}@PP$  and  $\text{Ti}_3\text{C}_2@PP$  before cycling.

| Seperator                                             | $R_s$ ( $\Omega$ ) | $R_{ct}$ ( $\Omega$ ) |
|-------------------------------------------------------|--------------------|-----------------------|
| $\text{Ti}_3\text{C}_2\text{T}_x/\text{Ni-Co MOF}@PP$ | 1.6                | 16.6                  |
| $\text{Ti}_3\text{C}_2\text{T}_x@PP$                  | 1.9                | 31.2                  |
| PP                                                    | 2.2                | 29.1                  |

**Table S3.** Comparison of electrochemical performance of our work with various works.

|                                                                       | Sulfur content (wt %) | Sulfur loading ( $\text{mg cm}^{-2}$ ) | Current density (C) | Cycle number | Capacity decay per cycle (%) |
|-----------------------------------------------------------------------|-----------------------|----------------------------------------|---------------------|--------------|------------------------------|
| <b>This work</b>                                                      | <b>80</b>             | <b>1.5</b>                             | <b>1</b>            | <b>2000</b>  | <b>0.03</b>                  |
| Co-Bi/rGO <sup>9</sup>                                                | 70                    | 1.1                                    | 1                   | 500          | 0.051                        |
| S/V-N-C <sup>10</sup>                                                 | 75                    | 1.5                                    | 1                   | 1000         | 0.056                        |
| CoSe <sub>2</sub> /hNCTs/S <sup>11</sup>                              | 80                    | 1.3                                    | 1                   | 1000         | 0.069                        |
| CoZn-S <sup>12</sup>                                                  | 70                    | 1                                      | 1                   | 1800         | 0.04                         |
| S@Co-Fe-P <sup>13</sup>                                               | 71                    | 1                                      | 1                   | 500          | 0.043                        |
| P-Mo <sub>0.9</sub> Co <sub>0.1</sub> S <sub>2</sub> -2 <sup>14</sup> | 80                    | 2                                      | 1                   | 600          | 0.046                        |
| FPGS <sup>15</sup>                                                    | 80                    | 1                                      | 0.5                 | 500          | 0.05                         |
| CoNiP/rGO/S <sup>16</sup>                                             | 60                    | 1.5                                    | 1                   | 600          | 0.08                         |
| S@CoNi MOF <sup>17</sup>                                              | 86.5                  | 1.5                                    | 1                   | 500          | 0.036                        |

## References

1. Ren, Y.; Zhai, Q.; Wang, B.; Hu, L.; Ma, Y.; Dai, Y.; Tang, S.; Meng, X. Synergistic Adsorption-Electrocatalysis of 2D/2D heterostructure toward high performance Li-S batteries. *Chem. Eng. J.* 2022, 439, 135535.
2. Hu, Q.; Lu, J.; Yang, C.; Zhang, C.; Hu, J.; Chang, S.; Dong, H.; Wu, C.; Hong, Y.; Zhang, L. Promoting Reversible Redox Kinetics by Separator Architectures Based on CoS<sub>2</sub>/HPGC Interlayer as Efficient Polysulfide-Trapping Shield for Li-S Batteries. *Small* 2020, 16, 2002046.
3. Kresse, G.; Furthmuller, J. Efficiency of ab-initio total energy calculations for metals and semiconductors using a plane-wave basis set. *Comput. Mater. Sci.* 1996, 6, 15-50.
4. Kresse, G.; Furthmuller, J. Efficient iterative schemes for ab initio total-energy calculations using a plane-wave basis set. *Phys. Rev. B* 1996, 54, 11169-11186.
5. Perdew, J. P.; Burke, K.; Ernzerhof, M. Generalized gradient approximation made simple (vol 77, pg 3865, 1996). *Phys. Rev. Lett.* 1997, 78, 1396-1396.
6. Blochl, P. E. Projector augmented-wave method. *Phys. Rev. B Condens. Matter.* 1994, 50, 17953-17979.
7. Kresse, G.; Joubert, D. From ultrasoft pseudopotentials to the projector augmented-wave method. *Phys. Rev. B* 1999, 59, 1758-1775.
8. Yu, M.; Trinkle, D. R. Accurate and efficient algorithm for Bader charge integration. *J. Chem. Phys.* 2011, 134, 064111.
9. Li, C.; Qi, S.; Zhu, L.; Zhao, Y.; Huang, R.; He, Y.; Ge, W.; Liu, X.; Zhao, M.; Xu, L.; Qian, Y. Regulating polysulfide intermediates by ultrathin Co-Bi nanosheet electrocatalyst in lithium-sulfur batteries. *Nano Today* 2021, 40, 101246.
10. Yu, S.; Sun, Y.; Song, L.; Cao, X.; Chen, L.; An, X.; Liu, X.; Cai, W.; Yao, T.; Song, Y.; Zhang, W. Vanadium atom modulated electrocatalyst for accelerated Li-S chemistry. *Nano Energy* 2021, 89, 106414.
11. Su, H.; Lu, L.; Yang, M.; Cai, F.; Liu, W.; Li, M.; Hu, X.; Ren, M.; Zhang, X.; Zhou, Z. Decorating CoSe<sub>2</sub> on N-doped carbon nanotubes as catalysts and efficient polysulfides traps for Li-S batteries. *Chem. Eng. J.* 2022, 429, 132167.
12. Ye, Z.; Jiang, Y.; Li, L.; Wu, F.; Chen, R. Synergetic Anion Vacancies and Dense Heterointerfaces into Bimetal Chalcogenide Nanosheet Arrays for Boosting Electrocatalysis Sulfur Conversion. *Adv. Mater.* 2022, e2109552.
13. Chen, Y.; Zhang, W.; Zhou, D.; Tian, H.; Su, D.; Wang, C.; Stockdale, D.; Kang, F.; Li, B.; Wang, G. Co-Fe Mixed Metal Phosphide Nanocubes with Highly Interconnected-Pore Architecture as an Efficient Polysulfide Mediator for Lithium-Sulfur Batteries. *ACS Nano* 2019, 13, 4731-4741.
14. Lin, H.; Zhang, S.; Zhang, T.; Ye, H.; Yao, Q.; Zheng, G. W.; Lee, J. Y. Simultaneous Cobalt and Phosphorous Doping of MoS<sub>2</sub> for Improved Catalytic Performance on Polysulfide Conversion in Lithium-Sulfur Batteries. *Adv. Energy Mater.* 2019, 9, 1902096.
15. Zhang, Y.; Wang, Y.; Luo, R.; Yang, Y.; Lu, Y.; Guo, Y.; Liu, X.; Cao, S.; Kim, J. K.; Luo, Y. A 3D porous FeP/rGO modulated separator as a dual-function polysulfide barrier for high-performance lithium sulfur batteries. *Nanoscale Horiz.* 2020, 5, 530-540.
16. Xiao, T.; Yi, F.; Yang, M.; Liu, W.; Li, M.; Ren, M.; Zhang, X.; Zhou, Z. A composite of CoNiP quantum dot-decorated reduced graphene oxide as a sulfur host for Li-S batteries. *J. Mater. Chem. A* 2021, 9, 16692-16698.

17. Meng, R.; Du, Q.; Zhong, N.; Zhou, X.; Liu, S.; Yin, S.; Liang, X. A Tandem Electrocatalysis of Sulfur Reduction by Bimetal 2D MOFs. *Adv. Energy Mater.* 2021, 11, 2102819.
